# Supplementary figures and images for: Oxygen reduction reaction mechanism on P, N co-doped graphene: a density functional theory study
Source: Royal Society of Chemistry journal article supplement (doi:10.1039/c9nj04808a), 2019-01-01

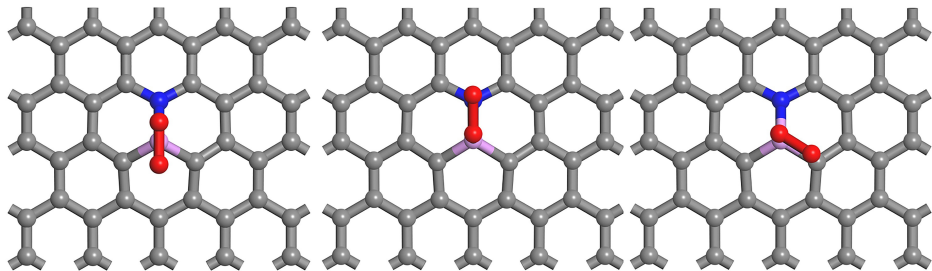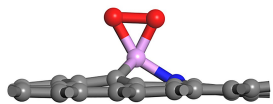

(a)  $E_{\text{ads}} = -1.81\text{eV}$

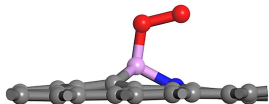

(b)  $E_{\text{ads}} = -0.63\text{eV}$

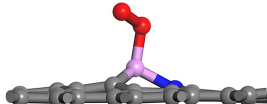

(c)  $E_{\text{ads}} = -0.66\text{eV}$

Supplement: c9nj04808a4.pdf [file c9nj04808a4.pdf]

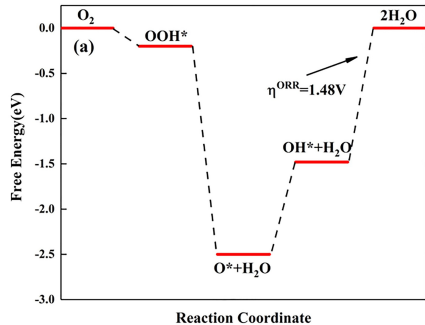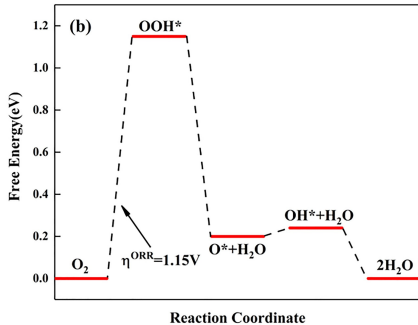

Supplement: c9nj04808a9.pdf [file c9nj04808a9.pdf]
